# Supplementary material
Source: Springer Nature journal article supplement (https://www.springermedizin.de/resource/supplementary/12884_2009_265_MOESM3_ESM.pdf/9457350)

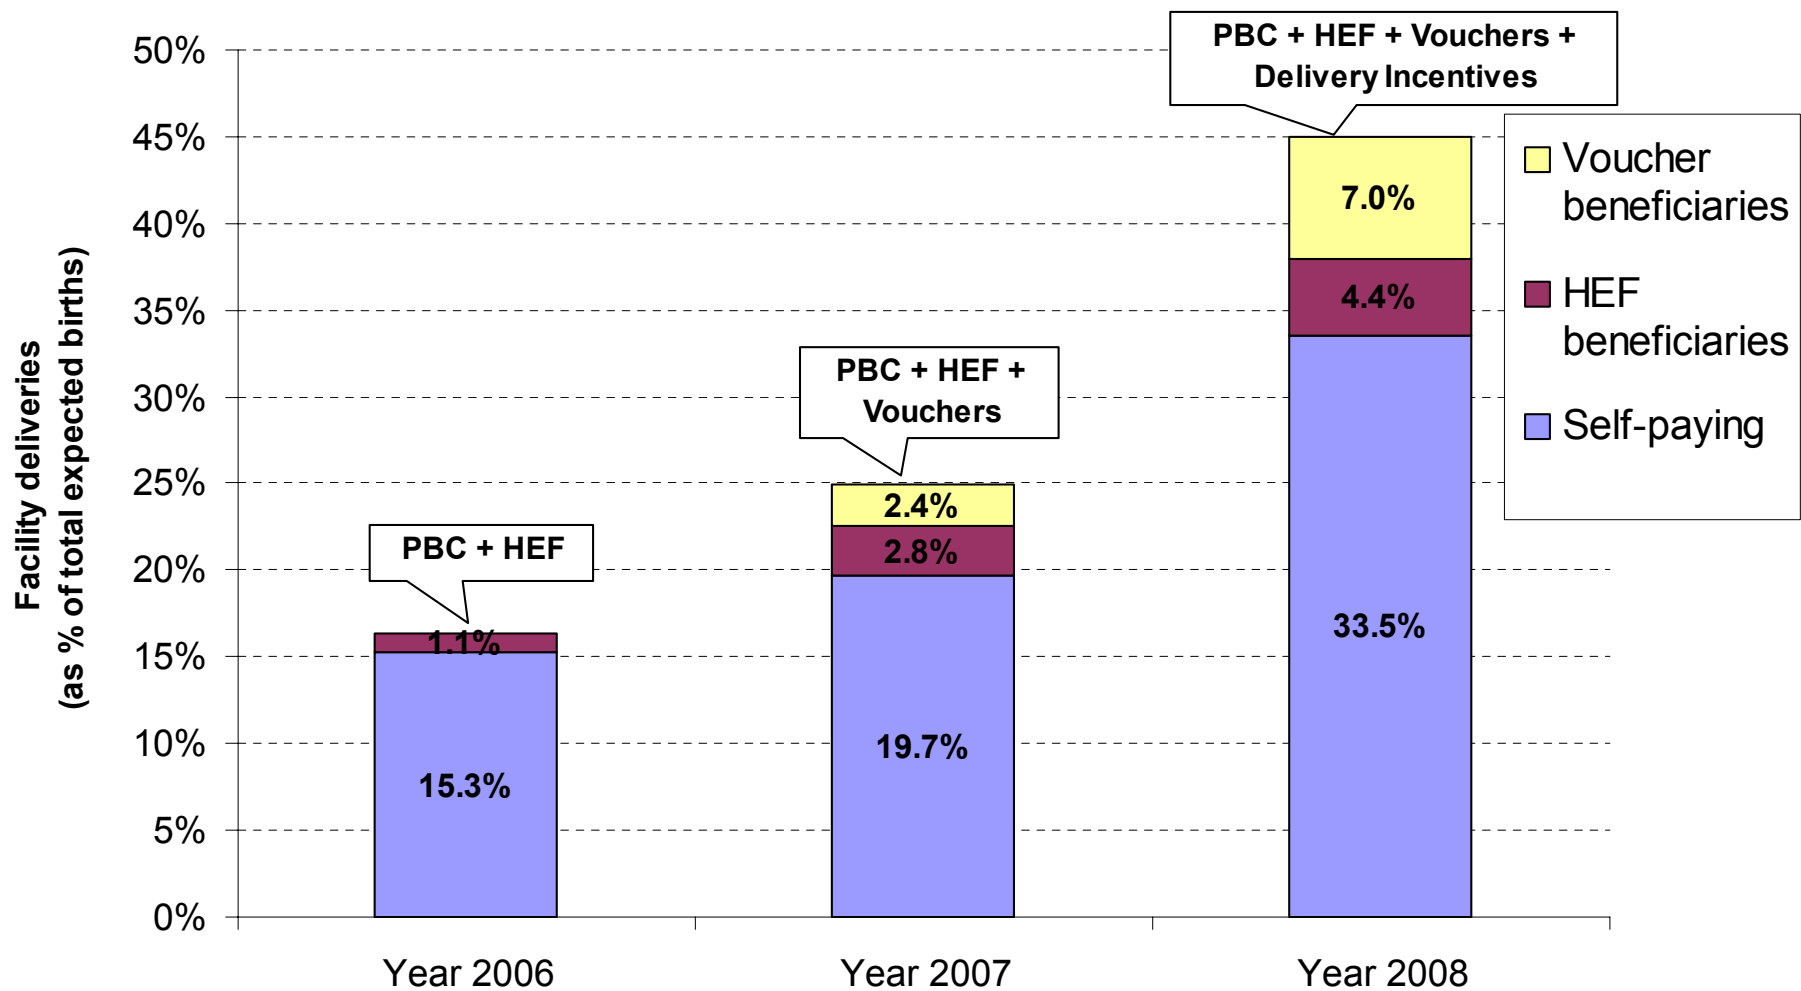

*PBC = Performance-Based Contracting; HEF = Health Equity Fund*

Supplement: MOESM3 [file 9457350]
